# Supplementary material for: Performance and Stability of Doped Ceria–Zirconia Catalyst for a Multifuel Reforming
Source: MDPI journal article supplement (doi:10.3390/catal13010165), 2023-01-10
Supplement: s1 [file s1]

# Performance and Stability of Doped Ceria–Zirconia Catalyst for a Multifuel Reforming

## List of supplementary figures and Tables

Table S1: Experimental conditions adopted for ATR, SR and ATR reactions over undoped NiCZ80 and doped NidpCZ80 catalysts.

Figure S1: XRD spectra of NiCZ80 spent catalyst after methane SR, POX and ATR reactions.

Figure S2: Conversion of propane in ATR, SR and POX conditions at  $T=800^{\circ}\text{C}$  GSVH=12000 h<sup>-1</sup> over undoped and doped catalysts, with and without 100 ppm H<sub>2</sub>S.

Figure S3: X-Ray patterns of NidCZ80 fresh and after ATR reactions of methane and propane with 100 ppm of H<sub>2</sub>S at  $T=800^{\circ}\text{C}$  and GSVH=120000 h<sup>-1</sup>.

Figure S4: TEM image of doped catalysts after ATR of methane at  $T=800^{\circ}\text{C}$  and GSHV=120000 h<sup>-1</sup>.

Figure S5: TEM image of undoped catalysts after ATR of propane at  $T=800^{\circ}\text{C}$  and GSHV=120000 h<sup>-1</sup>.

Figure S6: Reactors after endurance tests of undoped NiCZ80 and doped NidpCz80. The presence of coke is evident for the undoped NiCZ80 catalyst.

**Table S1.** Experimental conditions adopted for ATR, SR and ATR reactions over undoped NiCZ80 and doped NidpCZ80 catalysts.

| Reaction                      | Catalyst   | Fuel                             | Experimental conditions |     |                         |       |     |     |
|-------------------------------|------------|----------------------------------|-------------------------|-----|-------------------------|-------|-----|-----|
| Type                          | 3%NiCZ80   | CH <sub>4</sub>                  | S/C                     | O/C | GHSV [h <sup>-1</sup> ] | T     |     |     |
| ATR                           |            |                                  | 2.5                     | 0.5 | 120,000                 | 800°C |     |     |
| SR                            |            |                                  | 2.5                     | --  |                         |       |     |     |
| POX                           |            |                                  | --                      | 0.5 |                         |       |     |     |
| ATR /100ppm H <sub>2</sub> S  | 2.5        |                                  | 0.5                     |     |                         |       |     |     |
| ATR                           | 3%NidpCZ80 |                                  | 2.5                     | 0.5 |                         |       |     |     |
| SR                            |            |                                  | 2.5                     | --  |                         |       |     |     |
| POX                           |            |                                  | --                      | 0.5 |                         |       |     |     |
| ATR /100ppm H <sub>2</sub> S  |            |                                  | 2.5                     | 0.5 |                         |       |     |     |
| ATR                           | 3%NiCZ80   | C <sub>3</sub> H <sub>8</sub>    | 2.5                     | 0.5 |                         |       |     |     |
| SR                            |            |                                  | 2.5                     | --  |                         |       |     |     |
| POX                           |            |                                  | --                      | 0.5 |                         |       |     |     |
| ATR / 100ppm H <sub>2</sub> S |            |                                  | 2.5                     | 0.5 |                         |       |     |     |
| ATR                           |            |                                  | 3%NidpCZ80              |     |                         |       | 2.5 | 0.5 |
| SR                            |            |                                  |                         |     |                         |       | 2.5 | --  |
| POX                           |            |                                  |                         |     |                         |       | --  | 0.5 |
| ATR / 100ppm H <sub>2</sub> S |            |                                  |                         |     |                         |       | 2.5 | 0.5 |
| ATR                           | 3%NiCZ80   | CH <sub>4</sub> /CO <sub>2</sub> | 2.5                     | 0.5 |                         |       |     |     |
| ATR/ 100ppm H <sub>2</sub> S  |            |                                  | 2.5                     | 0.5 |                         |       |     |     |
| ATR                           | 3%NidpCZ80 | CH <sub>4</sub> /CO <sub>2</sub> | 2.5                     | 0.5 |                         |       |     |     |
| ATR/ 100ppm H <sub>2</sub> S  |            |                                  | 2.5                     | 0.5 |                         |       |     |     |

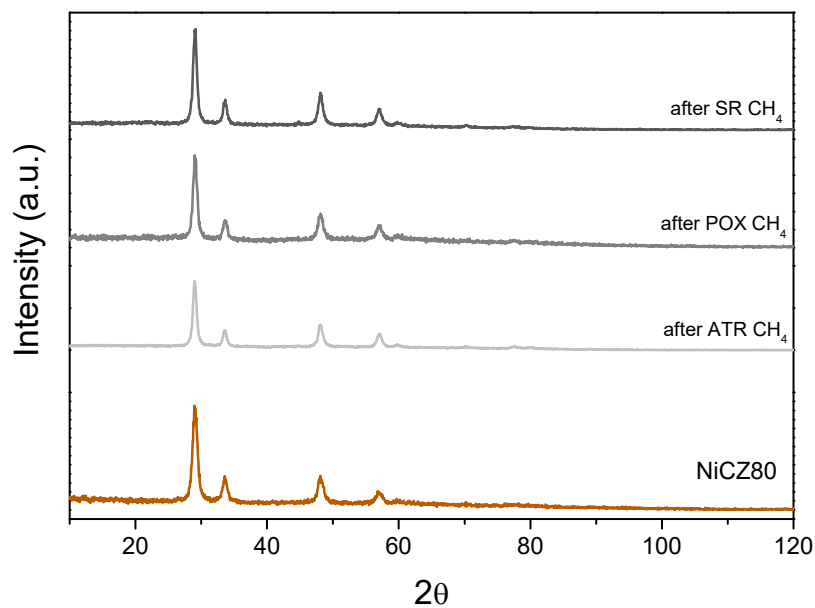

Figure S1. XRD spectra of NiCZ80 spent catalyst after methane SR, POX and ATR reactions.

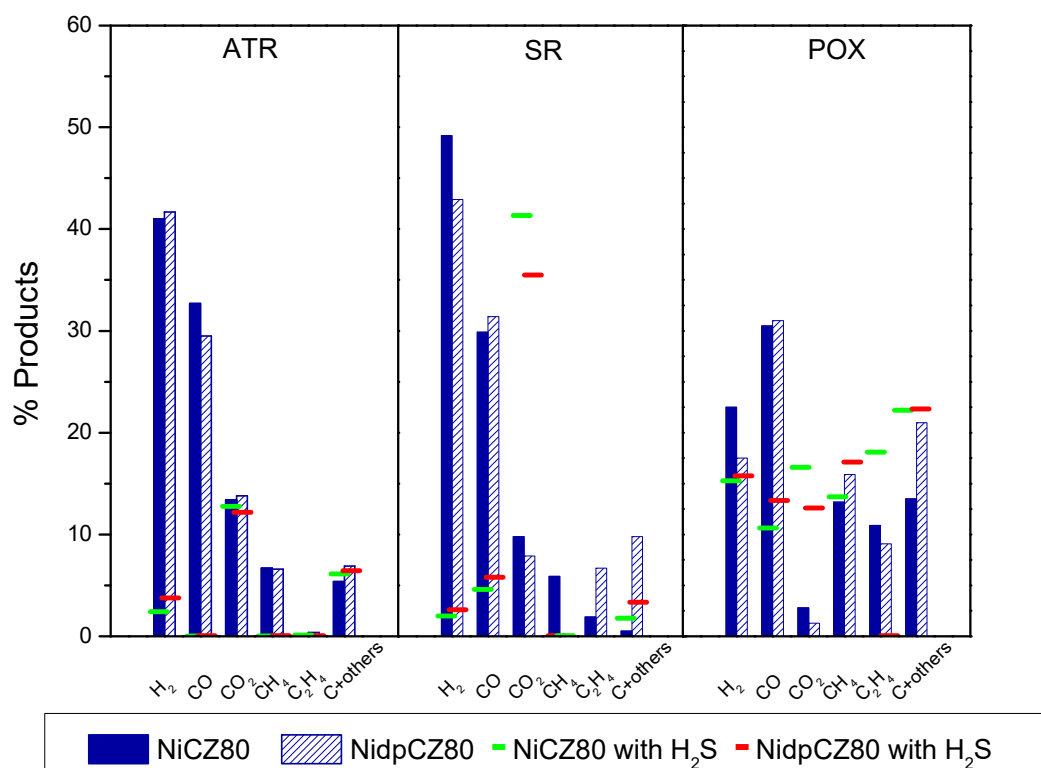

Figure S2. Conversion of propane in ATR, SR and POX conditions at T=800°C GSVH=12000 h-1 over undoped and doped catalysts, with and without 100 ppm H<sub>2</sub>S.

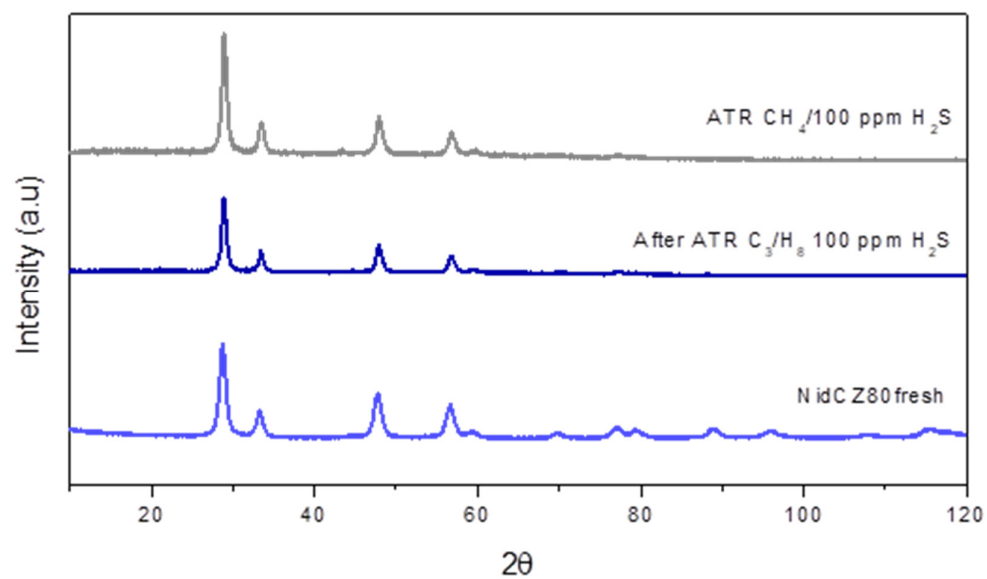

**Figure S3.** X-Ray patterns of NidCZ80 fresh and after ATR reactions of methane and propane with 100 ppm of H<sub>2</sub>S at T=800°C and GSVH=120000 h<sup>-1</sup>.

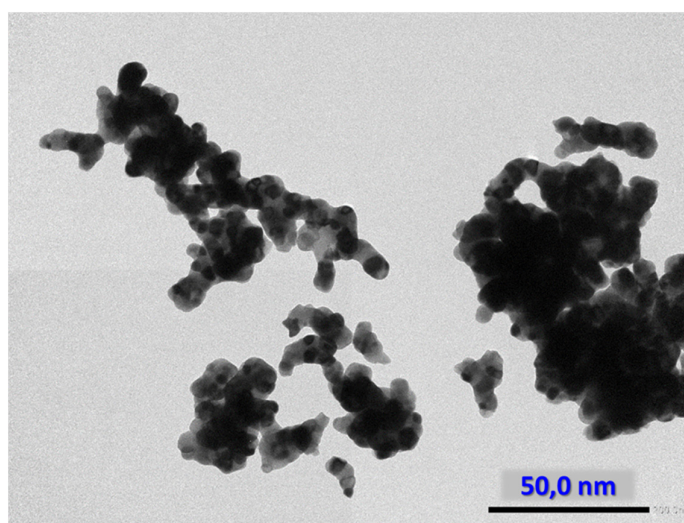

**Figure S4.** TEM image of doped catalysts after ATR of methane at T=800°C and GSHV=120000 h<sup>-1</sup>.

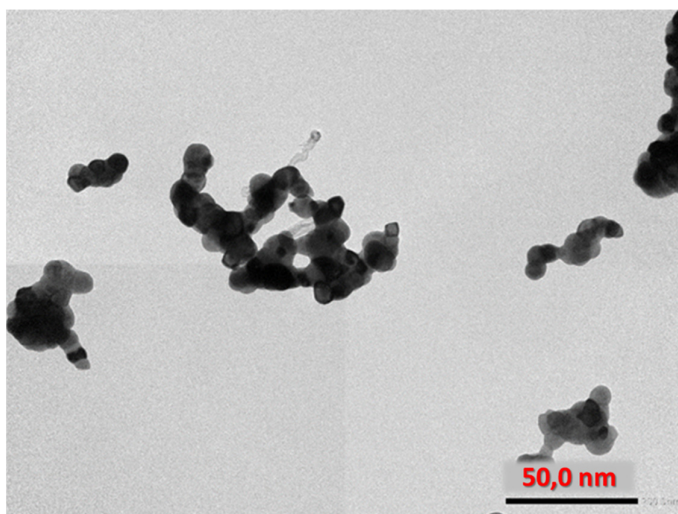

**Figure S5.** TEM image of undoped catalysts after ATR of propane at  $T=800^{\circ}\text{C}$  and  $\text{GSHV}=120000\text{ h}^{-1}$ .

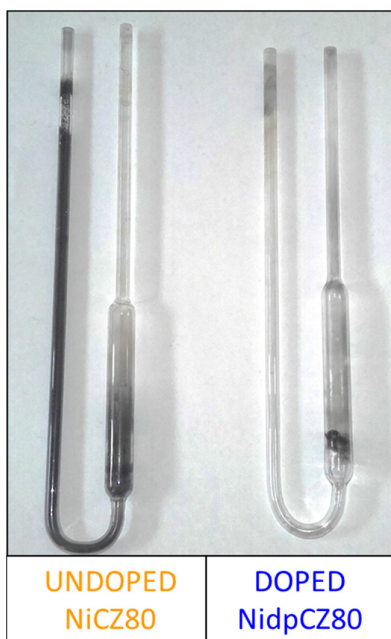

**Figure S6.** Reactors after endurance tests of undoped NiCZ80 and doped NidpCZ80. The presence of coke is evident for the undoped NiCZ80 catalyst.
